# Supplementary material for: Annona muricataleaf extract attenuates hepatic lipogenesis and adipogenesis
Source: Royal Society of Chemistry journal article supplement (doi:10.1039/d1fo00509j), 2021-01-01
Supplement: d1fo00509j1.pdf [file d1fo00509j1.pdf]

Supplementary Table 1 The sequences of primers used in this study

| Genes          | Primer Sequences                                                                                 |
|----------------|--------------------------------------------------------------------------------------------------|
| $\beta$ -actin | Forward 5'- GAC GTT GAC ATC CGT AAA G -3'<br>Reverse 5'- CAG TAA CAG TCC GCC T -3'               |
| aP2(FABP4)     | Forward 5'- AAG GTG AAG AGC ATC ATA ACC CT -3'<br>Reverse 5'- TCA CGC CTT TCA TAA CAC ATT CC -3' |
| CEPB/ $\alpha$ | Forward 5'- GAA CAG CAA CGA GTA CCG GGT A -3'<br>Reverse 5'- GCC ATG GCC TTG ACC AAG GAG-3'      |
| PPAR $\gamma$  | Forward 5'- GAG TGT GAC GAC AAG ATT TG -3'<br>Reverse 5'- GGT GGG CCA GAA TGG CAT CT-3'          |
| FAS            | Forward 5'- GCT GCG GAA ACT TCA GGA AAT -3'<br>Reverse 5'- AGA GAC GTG TCA CTC CTG GAC TT -3'    |
| SCD1           | Forward 5'- TTC TTG CGA TAC ACT CTG GTG C -3'<br>Reverse 5'- CCG GAT TGA ATG TTC TTG TCG T -3'   |
| DGAT2          | Forward 5'- CCG CAA AGG CTT TGT GAA -3'<br>Reverse 5'- GGA ATA AGT GGG AAC CAG ATC AG -3'        |
| ACOX1          | Forward 5'- ACG CCA CTT CCT TGC TCT TC -3'<br>Reverse 5'- AGA TTG GTA GAA ATT GCT GCA AA -3'     |
| CPT1           | Forward 5'- CTT CCA AGG CAG AAG AGT GGG -3'<br>Reverse 5'- GAA CCT TGG CTG CGG TAA GAC -3'       |
| PPAR $\alpha$  | Forward 5'- ATC CAC GAA GCC TAC C -3'<br>Reverse 5'- CAC ACC GTA CTT TAG CAA G -3'               |
| HSL            | Forward 5'-CCA GCC TGA GGG CTT ACT G -3'<br>Reverse 5'- CTC CAT TGA CTG TGA CAT CTC G -3'        |
| ATGL           | Forward 5'- GAA TGG CGG CAT TTC AGA CA -3'<br>Reverse 5'- CAA AGG GTT GGG TTG GTT CAG -3'        |
| MTTP           | Forward 5'- CTC TTG GCA GTG CTT TTT CTC T -3'<br>Reverse 5'- GAG CTT GTA TAG CCG CTC ATT -3'     |
| ApoB           | Forward 5'- GCT CAA CTC AGG TTA CCG TGA -3'<br>Reverse 5'- AGA GGG CTG ACA CTT GTA CTG -3'       |
| CD36           | Forward 5'- ATT GGT CAA GCC AGC T -3'<br>Reverse 5'- TGT AGG CTC ATC CAC TAC -3'                 |
